# Supplementary material
Source: PubMed Central journal article supplement (PMC3093902)
Supplement: supp_M110.215707_jbc.M110.215707-1.pdf [file supp_M110.215707_jbc.M110.215707-1.pdf]

## **Supplementary Data**

**Supp. 1. Powerplex 16™ System (Promega Corp., Madison, WI) characterization of the H460 cell line.** The first page is the result for the H460 cells. The 2nd and 3rd pages are positive and negative controls, respectively. The 4th page is an allelic ladder to which the unknown peaks are matched to provide a repeat number.

## **Supp. 2. AGR2 and AREG protein are expressed by neoplastic cells in esophageal adenocarcinoma.**

Tables containing the scoring for the immunohistochemical staining of AGR2 and AREG. For figure 1, only whether staining was present or not was tabulated. All of the images may be viewed at [http://tma.stanford.edu/tma\\_portal/index.shtml](http://tma.stanford.edu/tma_portal/index.shtml).

Sample 1: Seg-1\_20xdil\_A11\_001.fsa

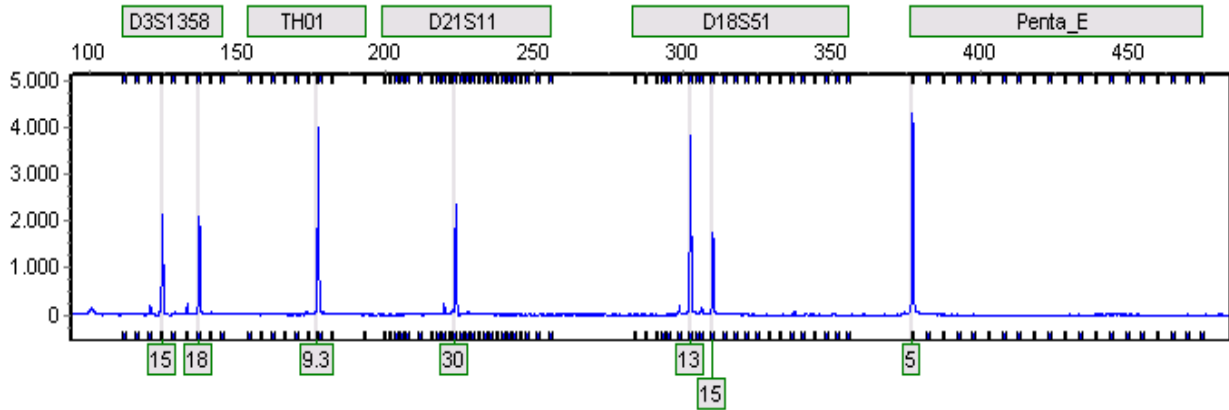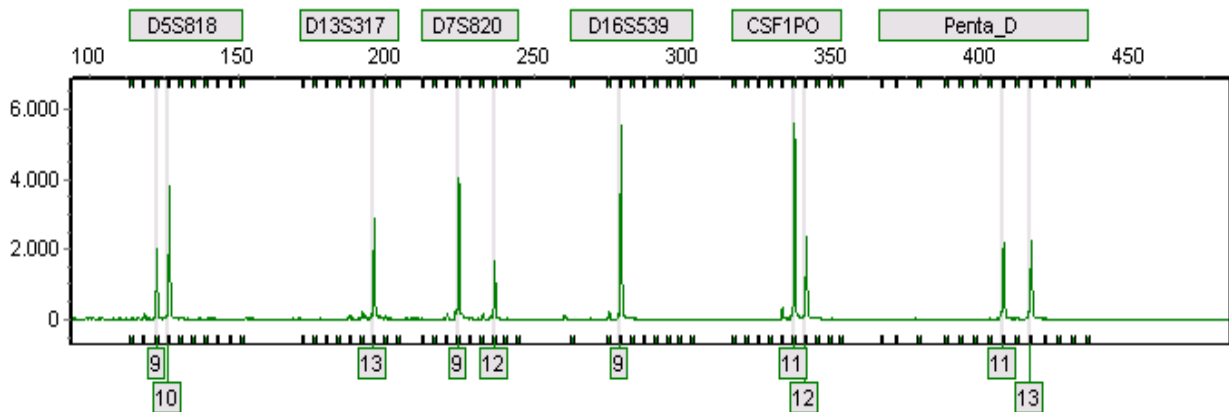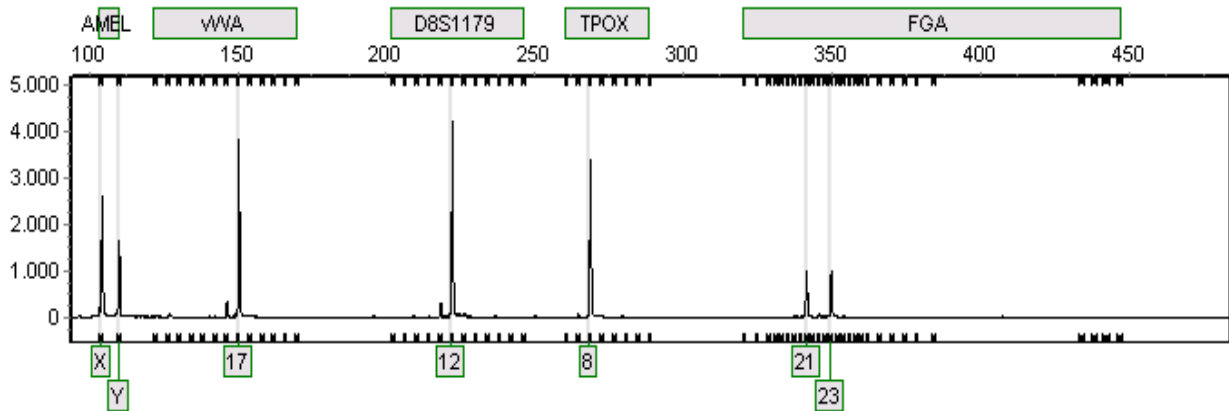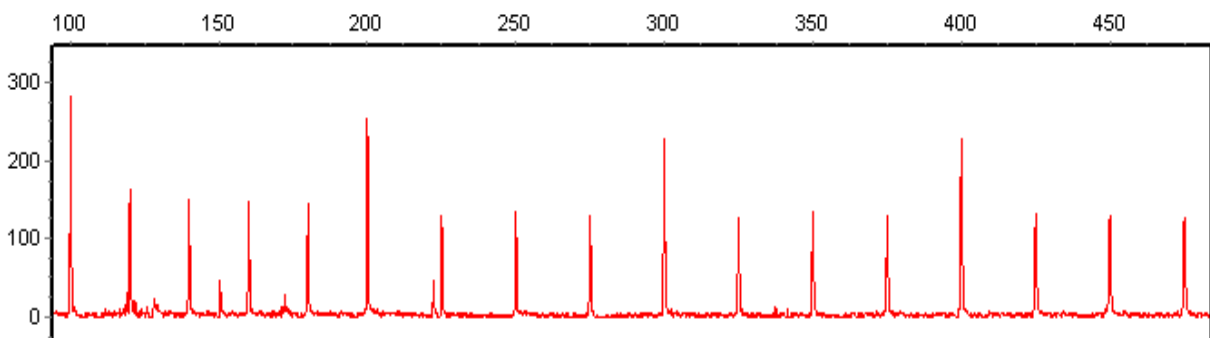

Sample 2: K-562\_C11\_005.fsa

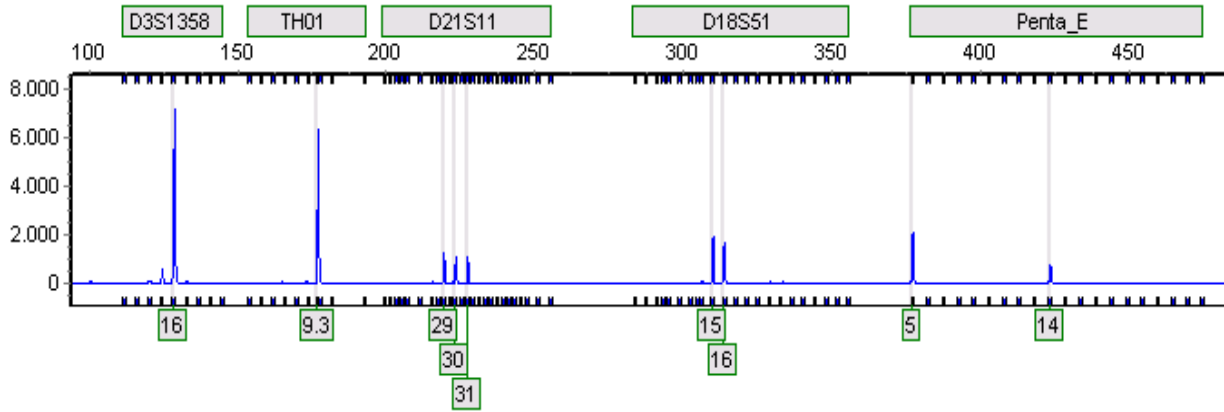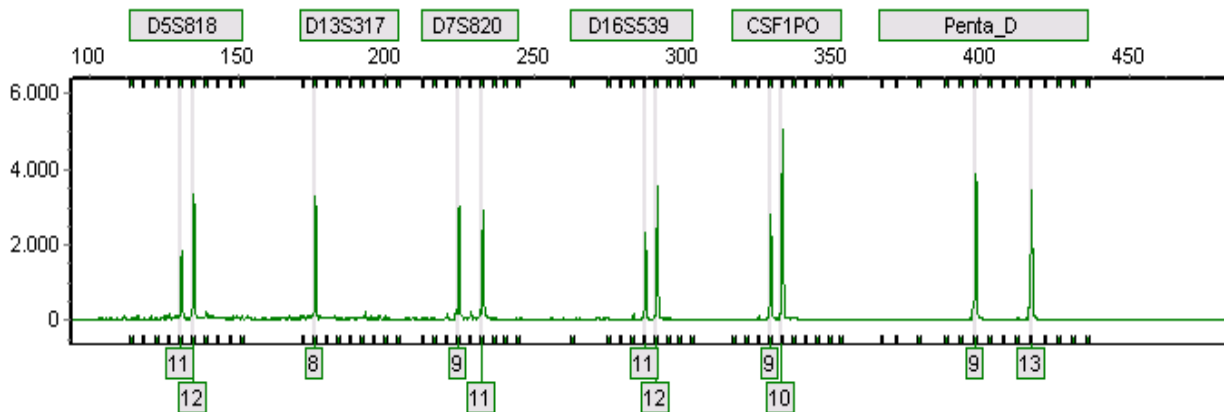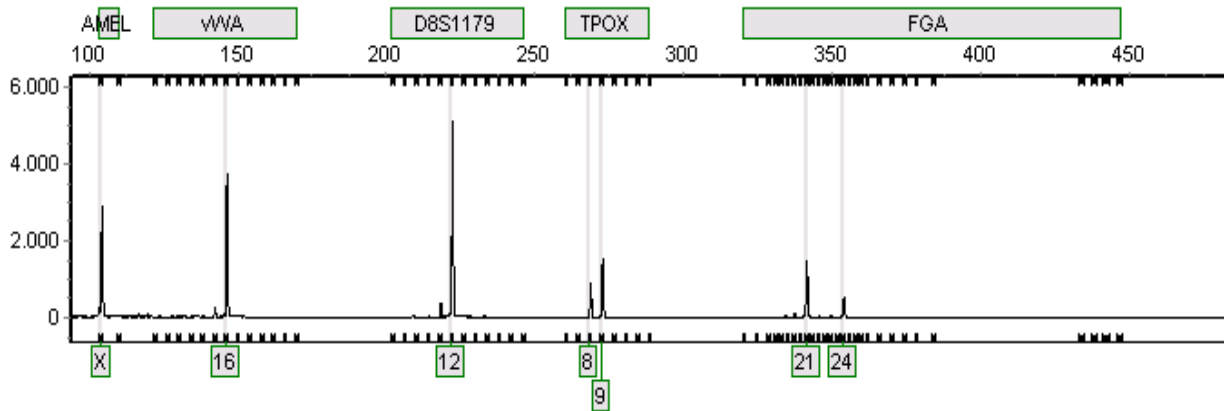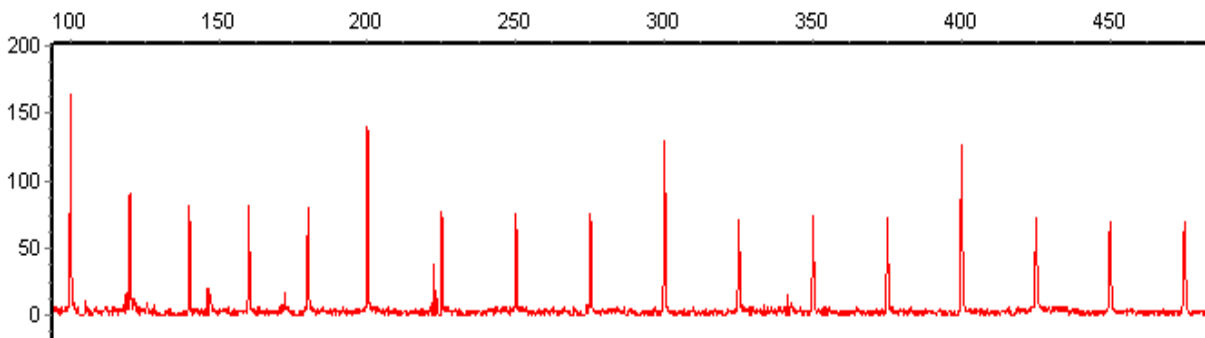

Sample 3: blank\_D11\_007.fsa

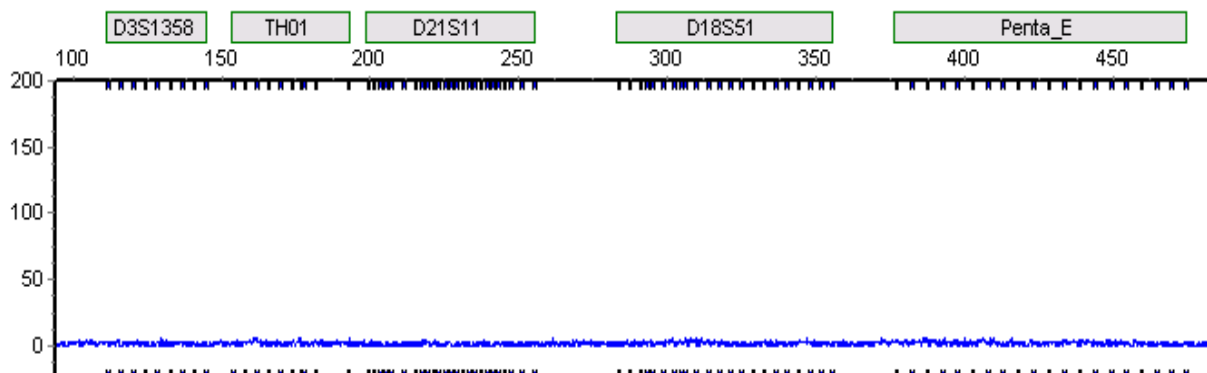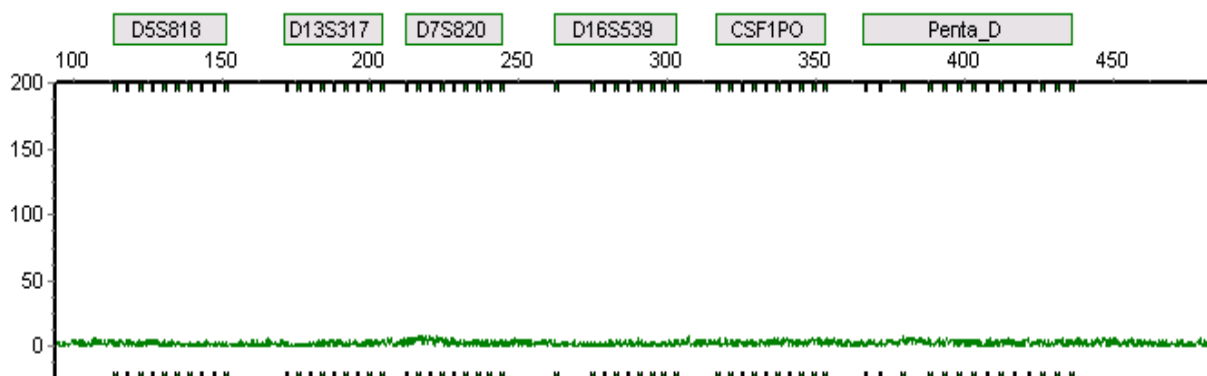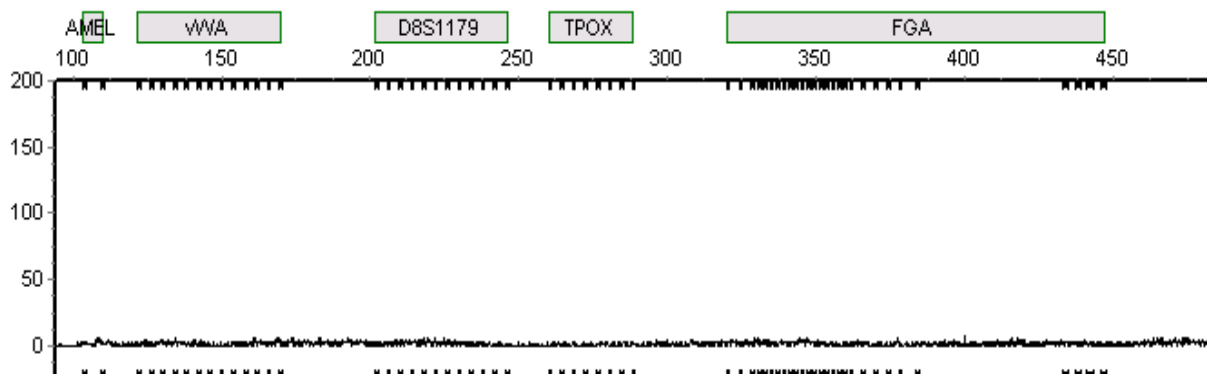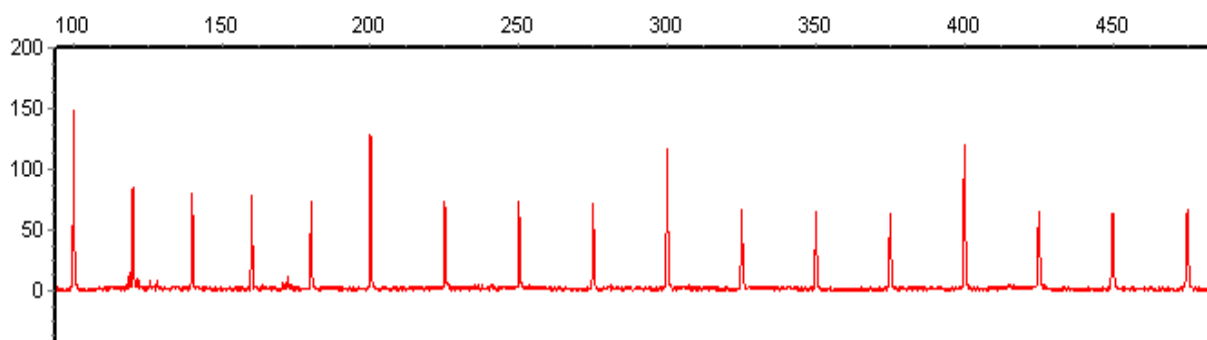

Sample 4: ladder\_G01\_013.fsa

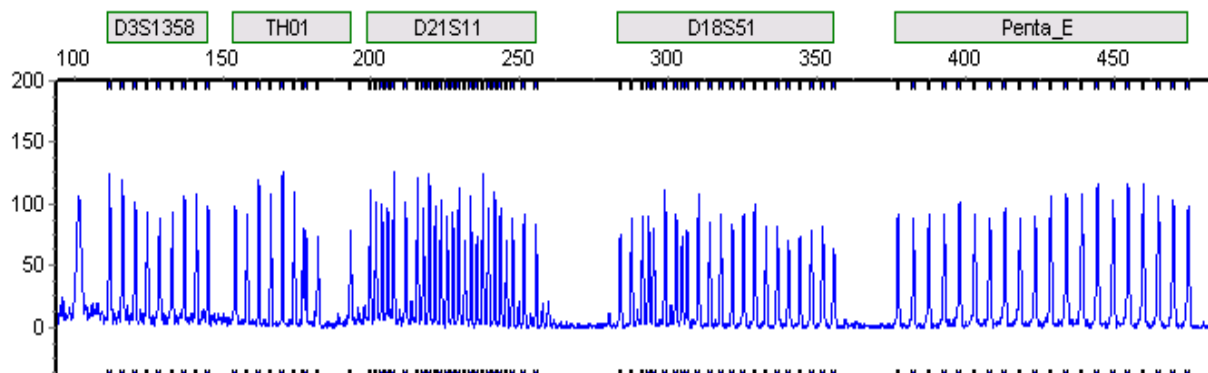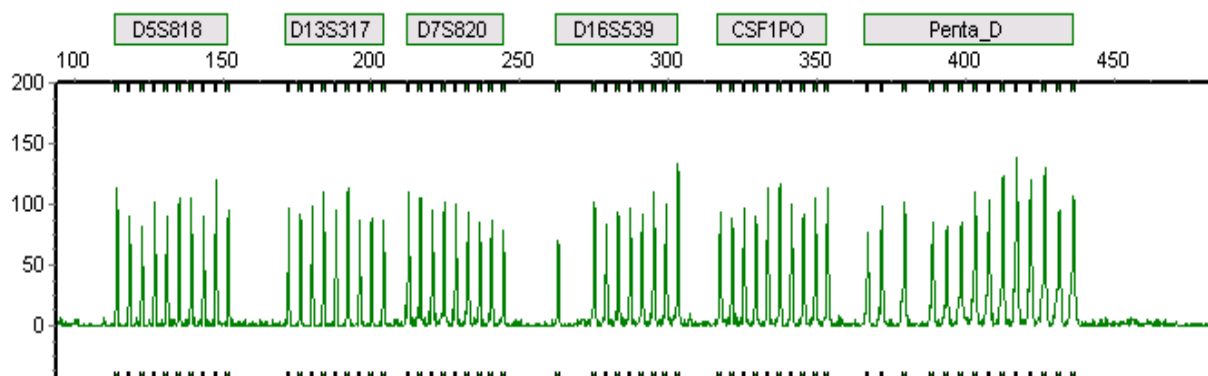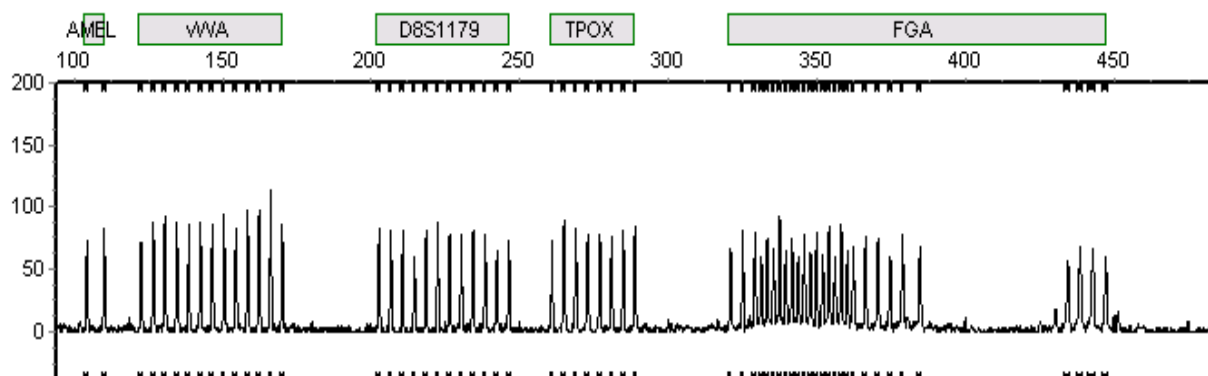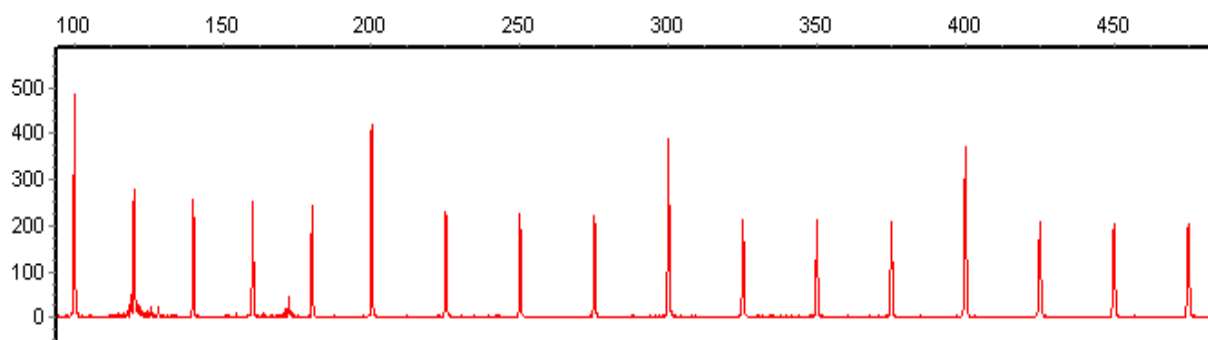

## Supplement 2

| TMA#                                                       | Tumor Type                  | AREG signal | AREG (0 to 3+ score) | AGR2 signal | AGR2 (0 to 3+ score) | Scoring scheme                                                                  |
|------------------------------------------------------------|-----------------------------|-------------|----------------------|-------------|----------------------|---------------------------------------------------------------------------------|
| <b>Intestinal adenocarcinoma without Barrett's</b>         |                             |             |                      |             |                      |                                                                                 |
| 19541                                                      | Invasive adenocarcinoma     | 0           | 0                    | 1           | 3                    | <b>Scoring scheme</b><br>0 - no staining<br>1 - 1-25%<br>2 - 25-75%<br>3 - >75% |
| 19542                                                      | Invasive adenocarcinoma     | 0           | 0                    | 1           | 2                    |                                                                                 |
| 19543                                                      | Invasive adenocarcinoma     | 1           | 3                    | 1           | 3                    |                                                                                 |
| 19544                                                      | Invasive adenocarcinoma     | 1           | 2                    | 1           | 3                    | <b>Signal</b><br>0=absent<br>1=present                                          |
| 19550                                                      | Invasive adenocarcinoma     | 1           | 1                    | 1           | 3                    |                                                                                 |
| 19551                                                      | Invasive adenocarcinoma     | 0           | 0                    | 1           | 3                    |                                                                                 |
| 19553                                                      | Invasive adenocarcinoma     | 0           | 0                    | 1           | 3                    |                                                                                 |
| 19554                                                      | Invasive adenocarcinoma     | 1           | 3                    | 1           | 3                    |                                                                                 |
| 19555                                                      | Invasive adenocarcinoma     | 1           | 3                    | 1           | 3                    |                                                                                 |
| 19557                                                      | Invasive adenocarcinoma     | 1           | 3                    | 1           | 3                    |                                                                                 |
| 19558                                                      | Invasive adenocarcinoma     | 1           | 1                    | 1           | 2                    |                                                                                 |
| 19564                                                      | Invasive adenocarcinoma     | 0           | 0                    | 1           | 3                    |                                                                                 |
| 19565                                                      | Invasive adenocarcinoma     | 1           | 2                    | 1           | 3                    |                                                                                 |
| 19545                                                      | Invasive adenocarcinoma     | 1           | 2                    | 1           | 3                    |                                                                                 |
| 19608                                                      | Invasive adenocarcinoma     | 1           | 1                    | 1           | 3                    |                                                                                 |
| 19616                                                      | Invasive adenocarcinoma     | 0           | 0                    | 1           | 3                    |                                                                                 |
| 19622                                                      | Invasive adenocarcinoma     | 1           | 2                    | 1           | 3                    |                                                                                 |
| 19628                                                      | Invasive adenocarcinoma     | 0           | 0                    | 1           | 2                    |                                                                                 |
| 19629                                                      | Invasive adenocarcinoma     | 1           | 1                    | 1           | 3                    |                                                                                 |
| 19632                                                      | Invasive adenocarcinoma     | 1           | 1                    | 1           | 3                    |                                                                                 |
| 19633                                                      | Invasive adenocarcinoma     | 0           | 0                    | 1           | 1                    |                                                                                 |
| 19634                                                      | Invasive adenocarcinoma     | 0           | 0                    | 1           | 2                    |                                                                                 |
| 19637                                                      | Invasive adenocarcinoma     | 1           | 1                    | 1           | 3                    |                                                                                 |
| 19649                                                      | Invasive adenocarcinoma     | 1           | 2                    | 1           | 3                    |                                                                                 |
| 19573                                                      | Invasive adenocarcinoma     | 1           | 3                    | 1           | 3                    |                                                                                 |
| 19575                                                      | Invasive adenocarcinoma     | 1           | 3                    | 1           | 3                    |                                                                                 |
| 19589                                                      | Invasive adenocarcinoma     | 1           | 2                    | 1           | 3                    |                                                                                 |
| 19593                                                      | Invasive adenocarcinoma     | 1           | 2                    | 1           | 3                    |                                                                                 |
| 19598                                                      | Invasive adenocarcinoma     | 0           | 0                    | 1           | 3                    |                                                                                 |
| 19621                                                      | Invasive adenocarcinoma     | 1           | 2                    | 1           | 1                    |                                                                                 |
| 19618                                                      | Invasive adenocarcinoma     | 0           | 0                    | 1           | 2                    |                                                                                 |
| 19600                                                      | Invasive adenocarcinoma     | 1           | 2                    | 1           | 3                    |                                                                                 |
|                                                            |                             | 21          |                      | 32          |                      |                                                                                 |
| <b>Intestinal adenocarcinoma associated with Barrett's</b> |                             |             |                      |             |                      |                                                                                 |
| 19534                                                      | Invasive adenocarcinoma     | 1           | 1                    | 1           | 3                    |                                                                                 |
| 19536 & 19537                                              | Invasive adenocarcinoma     | 1           | 2                    | 1           | 3                    |                                                                                 |
| 19538                                                      | Invasive adenocarcinoma     | 0           | 0                    | 1           | 3                    |                                                                                 |
| 19547                                                      | Invasive adenocarcinoma     | 1           | 2                    | 1           | 3                    |                                                                                 |
| 19552                                                      | Invasive adenocarcinoma     | 1           | 3                    | 1           | 3                    |                                                                                 |
| 19548                                                      | Invasive adenocarcinoma     | 1           | 3                    | 1           | 3                    |                                                                                 |
| 19559                                                      | Invasive adenocarcinoma     | 1           | 2                    | 1           | 3                    |                                                                                 |
| 19563                                                      | invasive adenocarcinoma     | 1           | 3                    | 1           | 3                    |                                                                                 |
| 19568                                                      | Invasive adenocarcinoma     | 1           | 1                    | 1           | 2                    |                                                                                 |
| 19578                                                      | Invasive adenocarcinoma     | 1           | 3                    | 1           | 3                    |                                                                                 |
| 19582                                                      | Invasive adenocarcinoma     | 1           | 2                    | 1           | 3                    |                                                                                 |
| 19595                                                      | Invasive adenocarcinoma     | 1           | 3                    | 1           | 3                    |                                                                                 |
| 19602 & 19604                                              | Invasive adenocarcinoma     | 1           | 3                    | 1           | 3                    |                                                                                 |
| 19613                                                      | Invasive adenocarcinoma     | 1           | 3                    | 1           | 3                    |                                                                                 |
| 19620                                                      | Intramucosal adenocarcinoma | 1           | 2                    | 1           | 2                    |                                                                                 |
| 19623                                                      | Invasive adenocarcinoma     | 1           | 3                    | 1           | 3                    |                                                                                 |
| 19625                                                      | Invasive adenocarcinoma     | 1           | 2                    | 1           | 2                    |                                                                                 |
| 19631                                                      | Invasive adenocarcinoma     | 0           | 0                    | 1           | 2                    |                                                                                 |
| 19636                                                      | Invasive adenocarcinoma     | 1           | 2                    | 1           | 3                    |                                                                                 |

|       |                                          |    |   |    |   |
|-------|------------------------------------------|----|---|----|---|
| 19643 | Invasive adenocarcinoma                  | 1  | 3 | 1  | 2 |
| 19645 | Invasive adenocarcinoma                  | 0  | 0 | 1  | 2 |
| 19648 | Invasive adenocarcinoma                  | 0  | 0 | 1  | 3 |
| 19650 | Invasive adenocarcinoma                  | 1  | 3 | 1  | 3 |
| 19656 | Invasive adenocarcinoma                  | 1  | 3 | 1  | 3 |
| 19659 | Intramucosal adenocarcinoma              | 1  | 1 | 1  | 3 |
| 19571 | Invasive adenocarcinoma                  | 1  | 3 | 1  | 3 |
| 19591 | Invasive adenocarcinoma                  | 1  | 3 | 1  | 3 |
| 19597 | Invasive adenocarcinoma                  | 1  | 3 | 1  | 3 |
| 19540 | Invasive adenocarcinoma                  | 1  | 3 | 1  | 3 |
| 19556 | Invasive adenocarcinoma                  | 1  | 3 | 1  | 3 |
| 19566 | Invasive adenocarcinoma                  | 0  | 0 | 1  | 3 |
| 19627 | Invasive adenocarcinoma                  | 1  | 1 | 1  | 3 |
| 19638 | Invasive adenocarcinoma                  | 0  | 0 | 1  | 3 |
| 19660 | Invasive adenocarcinoma                  | 1  | 1 | 1  | 2 |
| 19663 | Invasive adenocarcinoma                  | 1  | 1 | 1  | 3 |
| 19576 | Invasive adenocarcinoma                  | 1  | 1 | 1  | 3 |
| 19588 | Invasive adenocarcinoma                  | 1  | 3 | 1  | 3 |
| 19653 | Adenocarcinoma with signet ring features | 1  | 3 | 1  | 3 |
|       |                                          | 32 |   | 38 |   |

**Barrett's mucosa without dysplasia**

|               |                                    |    |   |    |   |
|---------------|------------------------------------|----|---|----|---|
| 19526         | Barrett's mucosa without dysplasia | 1  | 3 | 1  | 3 |
| 19528 & 19530 | Barrett's mucosa without dysplasia | 1  | 2 | 1  | 2 |
| 19533         | Barrett's mucosa without dysplasia | 1  | 3 | 1  | 3 |
| 19535         | Barrett's mucosa without dysplasia | 1  | 2 | 1  | 2 |
| 19539         | Barrett's mucosa without dysplasia | 1  | 3 | 1  | 3 |
| 19546         | Barrett's mucosa without dysplasia | 1  | 3 | 1  | 3 |
| 19549         | Barrett's mucosa without dysplasia | 1  | 3 | 1  | 3 |
| 19560         | Barrett's mucosa without dysplasia | 1  | 3 | 1  | 3 |
| 19562         | Barrett's mucosa without dysplasia | 1  | 3 | 1  | 3 |
| 19567         | Barrett's mucosa without dysplasia | 1  | 3 | 1  | 3 |
| 19577         | Barrett's mucosa without dysplasia | 1  | 3 | 1  | 3 |
| 19585         | Barrett's mucosa without dysplasia | 1  | 3 | 1  | 2 |
| 19601         | Barrett's mucosa without dysplasia | 1  | 3 | 1  | 3 |
| 19606         | Barrett's mucosa without dysplasia | 1  | 3 | 1  | 2 |
| 19609         | Barrett's mucosa without dysplasia | 1  | 1 | 1  | 1 |
| 19615         | Barrett's mucosa without dysplasia | 1  | 3 | 1  | 3 |
| 19619         | Barrett's mucosa without dysplasia | 1  | 3 | 1  | 3 |
| 19630         | Barrett's mucosa without dysplasia | 1  | 3 | 1  | 3 |
| 19635         | Barrett's mucosa without dysplasia | 1  | 3 | 1  | 2 |
| 19641         | Barrett's mucosa without dysplasia | 1  | 3 | 1  | 1 |
| 19646         | Barrett's mucosa without dysplasia | 1  | 3 | 1  | 3 |
| 19647         | Barrett's mucosa without dysplasia | 1  | 3 | 1  | 3 |
| 19651         | Barrett's mucosa without dysplasia | 1  | 2 | 1  | 3 |
| 19654         | Barrett's mucosa without dysplasia | 1  | 2 | 1  | 1 |
| 19657         | Barrett's mucosa without dysplasia | 1  | 3 | 1  | 1 |
| 19594         | Barrett's mucosa without dysplasia | 1  | 3 | 1  | 3 |
|               |                                    | 26 |   | 26 |   |

**Barrett's with dysplasia**

|       |                                          |   |   |   |   |
|-------|------------------------------------------|---|---|---|---|
| 19529 | High grade dysplasia in Barrett's mucosa | 1 | 2 | 1 | 2 |
| 19561 | High grade dysplasia in Barrett's mucosa | 1 | 3 | 1 | 3 |
| 19569 | High grade dysplasia in Barrett's mucosa | 1 | 3 | 1 | 3 |

|       |                                          |    |   |    |   |
|-------|------------------------------------------|----|---|----|---|
| 19596 | High grade dysplasia in Barrett's mucosa | 1  | 3 | 1  | 3 |
| 19612 | High grade dysplasia in Barrett's mucosa | 1  | 3 | 1  | 3 |
| 19617 | High grade dysplasia in Barrett's mucosa | 1  | 2 | 1  | 3 |
| 19614 | High grade dysplasia in Barrett's mucosa | 1  | 2 | 1  | 1 |
| 19624 | High grade dysplasia in Barrett's mucosa | 1  | 3 | 1  | 3 |
| 19626 | High grade dysplasia in Barrett's mucosa | 1  | 3 | 1  | 2 |
| 19640 | High grade dysplasia in Barrett's mucosa | 1  | 3 | 1  | 3 |
| 19644 | High grade dysplasia in Barrett's mucosa | 1  | 3 | 1  | 2 |
| 19655 | High grade dysplasia in Barrett's mucosa | 1  | 3 | 1  | 3 |
| 19658 | High grade dysplasia in Barrett's mucosa | 1  | 3 | 1  | 3 |
| 19570 | High grade dysplasia in Barrett's mucosa | 1  | 3 | 1  | 3 |
|       | Low grade dysplasia in Barrett's mucosa  | 1  |   |    |   |
|       | Low grade dysplasia in Barrett's mucosa  | 1  | 3 | 1  | 3 |
| 19639 | Low grade dysplasia in Barrett's mucosa  | 1  | 3 | 1  | 3 |
| 19642 | High grade dysplasia in Barrett's mucosa | 1  | 3 | 1  | 3 |
| 19572 | Low grade dysplasia in Barrett's mucosa  | 1  | 3 | 1  | 3 |
|       |                                          | 18 |   | 18 |   |
